# Supplementary material for: Foot exercise plus education versus wait and see for the treatment of plantar heel pain (FEET trial): a protocol for a feasibility study
Source: Springer Nature journal article supplement (doi:10.1186/s13047-020-00384-1), 2020-01-01
Supplement: MOESM2 [file 17966790]

## Participant Screening Form

**Title:**

Foot Exercise and Education in the Treatment of plantar heel pain (FEET Trial): A feasibility trial.

**Protocol Number: 2019000772**

**Principal Investigator:**

Dr Melinda Smith, School of Health and Rehabilitation Sciences, The University of Queensland

**Associate Investigators:**

Prof Bill Vicenzino, School of Health and Rehabilitation Sciences, The University of Queensland  
 Dr Natalie Collins, School of Health and Rehabilitation Sciences, The University of Queensland  
 Dr Rebecca Mellor, School of Health and Rehabilitation Sciences, The University of Queensland  
 Dr Alison Grimaldi, PhysioTec and School of Health and Rehabilitation Sciences, The University of Queensland

|                   |                |
|-------------------|----------------|
| Participant Name: | DOB:           |
| Contact email:    | Contact phone: |

**Clinical characteristics of pain:**

1) Describe the onset of pain, including the date pain commenced:

2) Describe the *location* of symptoms:

a) Which is the painful limb:

left<sub>0</sub>  right<sub>1</sub>  both<sub>2</sub>

\*If both feet painful, which is the more painful side?  left<sub>0</sub>  right<sub>1</sub>

b) Please indicate on the body chart to the right, the location of your pain.

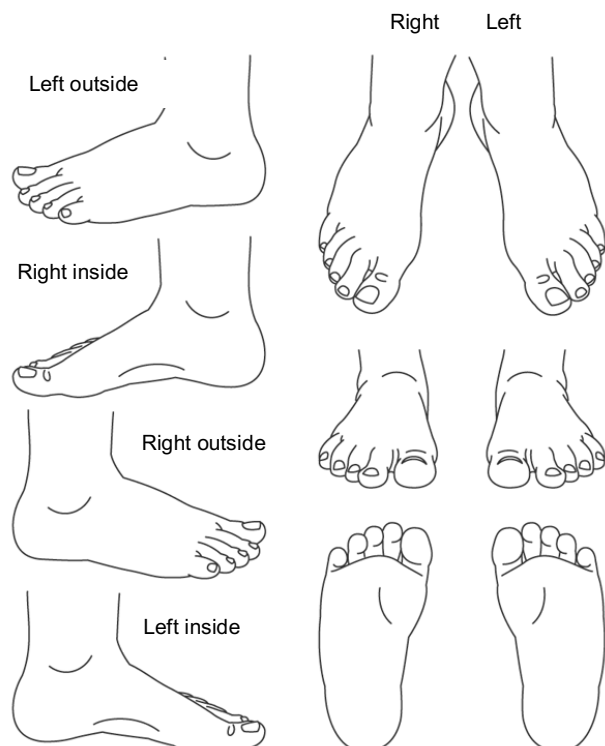



**Inclusion Criteria from phone screening (patient interview):**

|                                                             | YES                      | NO                       |
|-------------------------------------------------------------|--------------------------|--------------------------|
| 1. History of heel pain > 3 months                          | <input type="checkbox"/> | <input type="checkbox"/> |
| 2. Pain worse with initial steps after period of inactivity | <input type="checkbox"/> | <input type="checkbox"/> |
| 3. First step heel pain of > 3/10 on NRS                    | <input type="checkbox"/> | <input type="checkbox"/> |

**Exclusion Criteria from phone screening (patient interview):**

|                                                                                         | YES                      | NO                       | Please specify details: |
|-----------------------------------------------------------------------------------------|--------------------------|--------------------------|-------------------------|
| 1. Below 18 years of age                                                                | <input type="checkbox"/> | <input type="checkbox"/> |                         |
| 2. Corticosteroid injection for plantar fasciopathy within the previous six months      | <input type="checkbox"/> | <input type="checkbox"/> |                         |
| 2. Cardiac condition                                                                    | <input type="checkbox"/> | <input type="checkbox"/> |                         |
| 3. Neurological condition                                                               | <input type="checkbox"/> | <input type="checkbox"/> |                         |
| 4. Diabetes                                                                             | <input type="checkbox"/> | <input type="checkbox"/> |                         |
| 5. Auto-immune disorder                                                                 | <input type="checkbox"/> | <input type="checkbox"/> |                         |
| 6. Foot pathology/deformities (e.g. nerve impingement, stress fracture, hallux valgus)  | <input type="checkbox"/> | <input type="checkbox"/> |                         |
| 7. Previous foot surgery                                                                | <input type="checkbox"/> | <input type="checkbox"/> |                         |
| 8. Other lower limb pain/injury (preceding six months)                                  | <input type="checkbox"/> | <input type="checkbox"/> |                         |
| 9. Unsafe or unwilling to undergo MRI (please see detailed MRI screening on page below) | <input type="checkbox"/> | <input type="checkbox"/> |                         |

**Suitable for study based on phone screening (patient interview):**

Yes       No      Date:

**Physical examination scheduled for (date/time):**

| <b><u>MRI screening questions: Do you have (or have ever had):</u></b> |                             |                              |
|------------------------------------------------------------------------|-----------------------------|------------------------------|
| Cardiac pacemaker or artificial heart valve                            | <input type="checkbox"/> No | <input type="checkbox"/> Yes |
| Syringe driver (i.e. insulin infusion pump)                            | <input type="checkbox"/> No | <input type="checkbox"/> Yes |
| Brain aneurysm clip or aortic clip                                     | <input type="checkbox"/> No | <input type="checkbox"/> Yes |
| Stent, coil or catheter                                                | <input type="checkbox"/> No | <input type="checkbox"/> Yes |
| Electrical neurostimulators (DBS)                                      | <input type="checkbox"/> No | <input type="checkbox"/> Yes |
| Metal mesh implants / clips / wire sutures                             | <input type="checkbox"/> No | <input type="checkbox"/> Yes |
| Medicated skin patches                                                 | <input type="checkbox"/> No | <input type="checkbox"/> Yes |
| Hearing aid / implant                                                  | <input type="checkbox"/> No | <input type="checkbox"/> Yes |
| Glass eye                                                              | <input type="checkbox"/> No | <input type="checkbox"/> Yes |
| Joint replacement                                                      | <input type="checkbox"/> No | <input type="checkbox"/> Yes |
| Bullet / shrapnel wound                                                | <input type="checkbox"/> No | <input type="checkbox"/> Yes |
| Metal fragments in eye, head, skin                                     | <input type="checkbox"/> No | <input type="checkbox"/> Yes |
| Artificial limb                                                        | <input type="checkbox"/> No | <input type="checkbox"/> Yes |
| Do you work with metals?                                               | <input type="checkbox"/> No | <input type="checkbox"/> Yes |
| Do you suffer claustrophobia?                                          | <input type="checkbox"/> No | <input type="checkbox"/> Yes |
| Could you be pregnant?                                                 | <input type="checkbox"/> No | <input type="checkbox"/> Yes |
| Do you have an IUD?                                                    | <input type="checkbox"/> No | <input type="checkbox"/> Yes |
| Fractured bones treated with metal?                                    | <input type="checkbox"/> No | <input type="checkbox"/> Yes |
| Have you had any surgery?                                              | <input type="checkbox"/> No | <input type="checkbox"/> Yes |
| A shunt – spinal or ventricular?                                       | <input type="checkbox"/> No | <input type="checkbox"/> Yes |
| Do you have any tattoos?                                               | <input type="checkbox"/> No | <input type="checkbox"/> Yes |
| Dental bridge, dentures or retainer?                                   | <input type="checkbox"/> No | <input type="checkbox"/> Yes |
| Do you have a history of kidney disease / disorder?                    | <input type="checkbox"/> No | <input type="checkbox"/> Yes |
| Do you have asthma?                                                    | <input type="checkbox"/> No | <input type="checkbox"/> Yes |
| If you answered 'yes' to any of the above, please provide details:     |                             |                              |
|                                                                        |                             |                              |

**Cleared for MRI:**       No       Yes

**Inclusion Criteria from physical examination:**

|                                                                                  | YES                      | NO                       |
|----------------------------------------------------------------------------------|--------------------------|--------------------------|
| 1. Pain on palpation of the medial calcaneal tubercle or proximal plantar fascia | <input type="checkbox"/> | <input type="checkbox"/> |
| 2. Plantar fascia thickness >4mm from ultrasound image measurement               | <input type="checkbox"/> | <input type="checkbox"/> |

**Suitable for study following patient interview and physical examination:**

Yes

No

Date:

**Baseline testing scheduled for (date/time):**
