# Supplementary material for: Foot exercise plus education versus wait and see for the treatment of plantar heel pain (FEET trial): a protocol for a feasibility study
Source: Springer Nature journal article supplement (doi:10.1186/s13047-020-00384-1), 2020-01-01
Supplement: MOESM3 [file 17966790]

## Participant Logbook – Foot exercise and education

**Title:** Foot Exercise and Education in the Treatment of plantar heel pain (FEET Trial): A feasibility trial.  
**Protocol Number:** 2019000772  
**Principal Investigator:** Dr Melinda Smith, School of Health and Rehabilitation Sciences, The University of Queensland  
**Associate Investigators:** Prof Bill Vicenzino, School of Health and Rehabilitation Sciences, The University of Queensland  
 Dr Natalie Collins, School of Health and Rehabilitation Sciences, The University of Queensland  
 Dr Rebecca Mellor, School of Health and Rehabilitation Sciences, The University of Queensland  
 Dr Alison Grimaldi, PhysioTec and School of Health and Rehabilitation Sciences, The University of Queensland

Please use this logbook to record the following information daily for the 12 weeks of the intervention period.

**Week 1** Date of Week Beginning: \_\_\_\_\_ **Participant ID:** \_\_\_\_\_

| Exercise                                                                                                 | Monday | Tuesday | Wednesday | Thursday | Friday | Saturday | Sunday |
|----------------------------------------------------------------------------------------------------------|--------|---------|-----------|----------|--------|----------|--------|
| <b>DAILY EXERCISES</b>                                                                                   |        |         |           |          |        |          |        |
| Doming + long toe push  | Reps:  | Reps:   | Reps:     | Reps:    | Reps:  | Reps:    | Reps:  |
| Toe spread              | Reps:  | Reps:   | Reps:     | Reps:    | Reps:  | Reps:    | Reps:  |
| Great toe extension     | Reps:  | Reps:   | Reps:     | Reps:    | Reps:  | Reps:    | Reps:  |
| Less toe extension      | Reps:  | Reps:   | Reps:     | Reps:    | Reps:  | Reps:    | Reps:  |
| <b>Other relevant information</b>                                                                        |        |         |           |          |        |          |        |
| Details of other activities performed                                                                    |        |         |           |          |        |          |        |
| Details of any adverse events                                                                            |        |         |           |          |        |          |        |
| Details of treatment outside of study                                                                    |        |         |           |          |        |          |        |

For this past week, indicate (circle) the *intensity* of your **first step pain** (first steps out of bed in the morning): (Date completed: \_\_\_\_\_)  
 0 1 2 3 4 5 6 7 8 9 10  
 No pain Worst pain imaginable

**Week 2**

Date of Week Beginning: \_\_\_\_\_

Participant ID: \_\_\_\_\_

| Exercise                                   |             |               |                | Monday         | Tuesday        | Wednesday      | Thursday       | Friday         | Saturday       | Sunday         |
|--------------------------------------------|-------------|---------------|----------------|----------------|----------------|----------------|----------------|----------------|----------------|----------------|
| <b>DAILY EXERCISES</b>                     |             |               |                |                |                |                |                |                |                |                |
| Doming + long toe push                     |             |               |                | Reps:          | Reps:          | Reps:          | Reps:          | Reps:          | Reps:          | Reps:          |
| Toe spread                                 |             |               |                | Reps:          | Reps:          | Reps:          | Reps:          | Reps:          | Reps:          | Reps:          |
| Great toe extension                        |             |               |                | Reps:          | Reps:          | Reps:          | Reps:          | Reps:          | Reps:          | Reps:          |
| Less toe extension                         |             |               |                | Reps:          | Reps:          | Reps:          | Reps:          | Reps:          | Reps:          | Reps:          |
| Sit to stand                               |             |               |                | Reps:          | Reps:          | Reps:          | Reps:          | Reps:          | Reps:          | Reps:          |
| Single leg balance                         |             |               |                | Reps:          | Reps:          | Reps:          | Reps:          | Reps:          | Reps:          | Reps:          |
| <b>EXERCISES TO PERFORM 3 TIMES A WEEK</b> |             |               |                |                |                |                |                |                |                |                |
| Doming                                     | 2 leg squat | 1 leg squat   | Jump or hop    | Reps:<br>Sets: | Reps:<br>Sets: | Reps:<br>Sets: | Reps:<br>Sets: | Reps:<br>Sets: | Reps:<br>Sets: | Reps:<br>Sets: |
| Long toe push                              | Sit         | Stand         | Squat          | Reps:<br>Sets: | Reps:<br>Sets: | Reps:<br>Sets: | Reps:<br>Sets: | Reps:<br>Sets: | Reps:<br>Sets: | Reps:<br>Sets: |
| Seated heel raise                          | Sit         | Band max reps | Band max reps  | Reps:<br>Sets: | Reps:<br>Sets: | Reps:<br>Sets: | Reps:<br>Sets: | Reps:<br>Sets: | Reps:<br>Sets: | Reps:<br>Sets: |
| Standing heel raise                        | 2 leg       | 1 leg         | 1 leg max reps | Reps:<br>Sets: | Reps:<br>Sets: | Reps:<br>Sets: | Reps:<br>Sets: | Reps:<br>Sets: | Reps:<br>Sets: | Reps:<br>Sets: |
| <b>Other relevant information</b>          |             |               |                |                |                |                |                |                |                |                |
| Details of other activities performed      |             |               |                |                |                |                |                |                |                |                |
| Details of any adverse events              |             |               |                |                |                |                |                |                |                |                |
| Details of treatment outside of study      |             |               |                |                |                |                |                |                |                |                |

For this past week, indicate (circle) the *intensity* of your **first step pain** (first steps out of bed in the morning):

0 1 2 3 4 5 6 7 8 9  
No pain

(Date completed: \_\_\_\_\_)

10  
Worst pain imaginable

**Week 3**

Date of Week Beginning: \_\_\_\_\_

Participant ID: \_\_\_\_\_

| Exercise                                   |             |               |                | Monday         | Tuesday        | Wednesday      | Thursday       | Friday         | Saturday       | Sunday         |
|--------------------------------------------|-------------|---------------|----------------|----------------|----------------|----------------|----------------|----------------|----------------|----------------|
| <b>DAILY EXERCISES</b>                     |             |               |                |                |                |                |                |                |                |                |
| Doming + long toe push                     |             |               |                | Reps:          | Reps:          | Reps:          | Reps:          | Reps:          | Reps:          | Reps:          |
| Toe spread                                 |             |               |                | Reps:          | Reps:          | Reps:          | Reps:          | Reps:          | Reps:          | Reps:          |
| Great toe extension                        |             |               |                | Reps:          | Reps:          | Reps:          | Reps:          | Reps:          | Reps:          | Reps:          |
| Less toe extension                         |             |               |                | Reps:          | Reps:          | Reps:          | Reps:          | Reps:          | Reps:          | Reps:          |
| Sit to stand                               |             |               |                | Reps:          | Reps:          | Reps:          | Reps:          | Reps:          | Reps:          | Reps:          |
| Single leg balance                         |             |               |                | Reps:          | Reps:          | Reps:          | Reps:          | Reps:          | Reps:          | Reps:          |
| <b>EXERCISES TO PERFORM 3 TIMES A WEEK</b> |             |               |                |                |                |                |                |                |                |                |
| Doming                                     | 2 leg squat | 1 leg squat   | Jump or hop    | Reps:<br>Sets: | Reps:<br>Sets: | Reps:<br>Sets: | Reps:<br>Sets: | Reps:<br>Sets: | Reps:<br>Sets: | Reps:<br>Sets: |
| Long toe push                              | Sit         | Stand         | Squat          | Reps:<br>Sets: | Reps:<br>Sets: | Reps:<br>Sets: | Reps:<br>Sets: | Reps:<br>Sets: | Reps:<br>Sets: | Reps:<br>Sets: |
| Seated heel raise                          | Sit         | Band max reps | Band max reps  | Reps:<br>Sets: | Reps:<br>Sets: | Reps:<br>Sets: | Reps:<br>Sets: | Reps:<br>Sets: | Reps:<br>Sets: | Reps:<br>Sets: |
| Standing heel raise                        | 2 leg       | 1 leg         | 1 leg max reps | Reps:<br>Sets: | Reps:<br>Sets: | Reps:<br>Sets: | Reps:<br>Sets: | Reps:<br>Sets: | Reps:<br>Sets: | Reps:<br>Sets: |
| <b>Other relevant information</b>          |             |               |                |                |                |                |                |                |                |                |
| Details of other activities performed      |             |               |                |                |                |                |                |                |                |                |
| Details of any adverse events              |             |               |                |                |                |                |                |                |                |                |
| Details of treatment outside of study      |             |               |                |                |                |                |                |                |                |                |

For this past week, indicate (circle) the *intensity* of your **first step pain** (first steps out of bed in the morning):

0 1 2 3 4 5 6 7 8 9  
No pain

(Date completed: \_\_\_\_\_)

10  
Worst pain imaginable

**Week 4**

Date of Week Beginning: \_\_\_\_\_

Participant ID: \_\_\_\_\_

| Exercise                                   |             |               |                | Monday         | Tuesday        | Wednesday      | Thursday       | Friday         | Saturday       | Sunday         |
|--------------------------------------------|-------------|---------------|----------------|----------------|----------------|----------------|----------------|----------------|----------------|----------------|
| <b>DAILY EXERCISES</b>                     |             |               |                |                |                |                |                |                |                |                |
| Doming + long toe push                     |             |               |                | Reps:          | Reps:          | Reps:          | Reps:          | Reps:          | Reps:          | Reps:          |
| Toe spread                                 |             |               |                | Reps:          | Reps:          | Reps:          | Reps:          | Reps:          | Reps:          | Reps:          |
| Great toe extension                        |             |               |                | Reps:          | Reps:          | Reps:          | Reps:          | Reps:          | Reps:          | Reps:          |
| Less toe extension                         |             |               |                | Reps:          | Reps:          | Reps:          | Reps:          | Reps:          | Reps:          | Reps:          |
| Sit to stand                               |             |               |                | Reps:          | Reps:          | Reps:          | Reps:          | Reps:          | Reps:          | Reps:          |
| Single leg balance                         |             |               |                | Reps:          | Reps:          | Reps:          | Reps:          | Reps:          | Reps:          | Reps:          |
| <b>EXERCISES TO PERFORM 3 TIMES A WEEK</b> |             |               |                |                |                |                |                |                |                |                |
| Doming                                     | 2 leg squat | 1 leg squat   | Jump or hop    | Reps:<br>Sets: | Reps:<br>Sets: | Reps:<br>Sets: | Reps:<br>Sets: | Reps:<br>Sets: | Reps:<br>Sets: | Reps:<br>Sets: |
| Long toe push                              | Sit         | Stand         | Squat          | Reps:<br>Sets: | Reps:<br>Sets: | Reps:<br>Sets: | Reps:<br>Sets: | Reps:<br>Sets: | Reps:<br>Sets: | Reps:<br>Sets: |
| Seated heel raise                          | Sit         | Band max reps | Band max reps  | Reps:<br>Sets: | Reps:<br>Sets: | Reps:<br>Sets: | Reps:<br>Sets: | Reps:<br>Sets: | Reps:<br>Sets: | Reps:<br>Sets: |
| Standing heel raise                        | 2 leg       | 1 leg         | 1 leg max reps | Reps:<br>Sets: | Reps:<br>Sets: | Reps:<br>Sets: | Reps:<br>Sets: | Reps:<br>Sets: | Reps:<br>Sets: | Reps:<br>Sets: |
| <b>Other relevant information</b>          |             |               |                |                |                |                |                |                |                |                |
| Details of other activities performed      |             |               |                |                |                |                |                |                |                |                |
| Details of any adverse events              |             |               |                |                |                |                |                |                |                |                |
| Details of treatment outside of study      |             |               |                |                |                |                |                |                |                |                |

For this past week, indicate (circle) the *intensity* of your **first step pain** (first steps out of bed in the morning):

0 1 2 3 4 5 6 7 8 9  
No pain

(Date completed: \_\_\_\_\_)

10  
Worst pain imaginable

**Week 5**

Date of Week Beginning: \_\_\_\_\_

Participant ID: \_\_\_\_\_

| Exercise                                   |                                                                                               |                                                                                                 |                                                                                                   | Monday         | Tuesday        | Wednesday      | Thursday       | Friday         | Saturday       | Sunday         |
|--------------------------------------------|-----------------------------------------------------------------------------------------------|-------------------------------------------------------------------------------------------------|---------------------------------------------------------------------------------------------------|----------------|----------------|----------------|----------------|----------------|----------------|----------------|
| <b>DAILY EXERCISES</b>                     |                                                                                               |                                                                                                 |                                                                                                   |                |                |                |                |                |                |                |
| Doming + long toe push                     |                                                                                               |                |                                                                                                   | Reps:          | Reps:          | Reps:          | Reps:          | Reps:          | Reps:          | Reps:          |
| Toe spread                                 |                                                                                               |                |                                                                                                   | Reps:          | Reps:          | Reps:          | Reps:          | Reps:          | Reps:          | Reps:          |
| Great toe extension                        |                                                                                               |                |                                                                                                   | Reps:          | Reps:          | Reps:          | Reps:          | Reps:          | Reps:          | Reps:          |
| Less toe extension                         |                                                                                               |                |                                                                                                   | Reps:          | Reps:          | Reps:          | Reps:          | Reps:          | Reps:          | Reps:          |
| Sit to stand                               |                                                                                               |                |                                                                                                   | Reps:          | Reps:          | Reps:          | Reps:          | Reps:          | Reps:          | Reps:          |
| Single leg balance                         |                                                                                               |                |                                                                                                   | Reps:          | Reps:          | Reps:          | Reps:          | Reps:          | Reps:          | Reps:          |
| <b>EXERCISES TO PERFORM 3 TIMES A WEEK</b> |                                                                                               |                                                                                                 |                                                                                                   |                |                |                |                |                |                |                |
| Doming                                     |  2 leg squat |  1 leg squat   |  Jump or hop     | Reps:<br>Sets: | Reps:<br>Sets: | Reps:<br>Sets: | Reps:<br>Sets: | Reps:<br>Sets: | Reps:<br>Sets: | Reps:<br>Sets: |
| Long toe push                              |  Sit         |  Stand         |  Squat           | Reps:<br>Sets: | Reps:<br>Sets: | Reps:<br>Sets: | Reps:<br>Sets: | Reps:<br>Sets: | Reps:<br>Sets: | Reps:<br>Sets: |
| Seated heel raise                          |  Sit         |  Band max reps |  Band max reps   | Reps:<br>Sets: | Reps:<br>Sets: | Reps:<br>Sets: | Reps:<br>Sets: | Reps:<br>Sets: | Reps:<br>Sets: | Reps:<br>Sets: |
| Standing heel raise                        |  2 leg      |  1 leg        |  1 leg max reps | Reps:<br>Sets: | Reps:<br>Sets: | Reps:<br>Sets: | Reps:<br>Sets: | Reps:<br>Sets: | Reps:<br>Sets: | Reps:<br>Sets: |
| <b>Other relevant information</b>          |                                                                                               |                                                                                                 |                                                                                                   |                |                |                |                |                |                |                |
| Details of other activities performed      |                                                                                               |                                                                                                 |                                                                                                   |                |                |                |                |                |                |                |
| Details of any adverse events              |                                                                                               |                                                                                                 |                                                                                                   |                |                |                |                |                |                |                |
| Details of treatment outside of study      |                                                                                               |                                                                                                 |                                                                                                   |                |                |                |                |                |                |                |

For this past week, indicate (circle) the *intensity* of your **first step pain** (first steps out of bed in the morning):

0 1 2 3 4 5 6 7 8 9  
No pain

(Date completed: \_\_\_\_\_)

10  
Worst pain imaginable

**Week 6**

Date of Week Beginning: \_\_\_\_\_

Participant ID: \_\_\_\_\_

| Exercise                                   |             |               |                | Monday         | Tuesday        | Wednesday      | Thursday       | Friday         | Saturday       | Sunday         |
|--------------------------------------------|-------------|---------------|----------------|----------------|----------------|----------------|----------------|----------------|----------------|----------------|
| <b>DAILY EXERCISES</b>                     |             |               |                |                |                |                |                |                |                |                |
| Doming + long toe push                     |             |               |                | Reps:          | Reps:          | Reps:          | Reps:          | Reps:          | Reps:          | Reps:          |
| Toe spread                                 |             |               |                | Reps:          | Reps:          | Reps:          | Reps:          | Reps:          | Reps:          | Reps:          |
| Great toe extension                        |             |               |                | Reps:          | Reps:          | Reps:          | Reps:          | Reps:          | Reps:          | Reps:          |
| Less toe extension                         |             |               |                | Reps:          | Reps:          | Reps:          | Reps:          | Reps:          | Reps:          | Reps:          |
| Sit to stand                               |             |               |                | Reps:          | Reps:          | Reps:          | Reps:          | Reps:          | Reps:          | Reps:          |
| Single leg balance                         |             |               |                | Reps:          | Reps:          | Reps:          | Reps:          | Reps:          | Reps:          | Reps:          |
| <b>EXERCISES TO PERFORM 3 TIMES A WEEK</b> |             |               |                |                |                |                |                |                |                |                |
| Doming                                     | 2 leg squat | 1 leg squat   | Jump or hop    | Reps:<br>Sets: | Reps:<br>Sets: | Reps:<br>Sets: | Reps:<br>Sets: | Reps:<br>Sets: | Reps:<br>Sets: | Reps:<br>Sets: |
| Long toe push                              | Sit         | Stand         | Squat          | Reps:<br>Sets: | Reps:<br>Sets: | Reps:<br>Sets: | Reps:<br>Sets: | Reps:<br>Sets: | Reps:<br>Sets: | Reps:<br>Sets: |
| Seated heel raise                          | Sit         | Band max reps | Band max reps  | Reps:<br>Sets: | Reps:<br>Sets: | Reps:<br>Sets: | Reps:<br>Sets: | Reps:<br>Sets: | Reps:<br>Sets: | Reps:<br>Sets: |
| Standing heel raise                        | 2 leg       | 1 leg         | 1 leg max reps | Reps:<br>Sets: | Reps:<br>Sets: | Reps:<br>Sets: | Reps:<br>Sets: | Reps:<br>Sets: | Reps:<br>Sets: | Reps:<br>Sets: |
| <b>Other relevant information</b>          |             |               |                |                |                |                |                |                |                |                |
| Details of other activities performed      |             |               |                |                |                |                |                |                |                |                |
| Details of any adverse events              |             |               |                |                |                |                |                |                |                |                |
| Details of treatment outside of study      |             |               |                |                |                |                |                |                |                |                |

For this past week, indicate (circle) the *intensity* of your **first step pain** (first steps out of bed in the morning):

0 1 2 3 4 5 6 7 8 9  
No pain

(Date completed: \_\_\_\_\_)

10  
Worst pain imaginable

**Week 7**

Date of Week Beginning: \_\_\_\_\_

Participant ID: \_\_\_\_\_

| Exercise                                   |                                                                                               |                                                                                                 |                                                                                                   | Monday         | Tuesday        | Wednesday      | Thursday       | Friday         | Saturday       | Sunday         |
|--------------------------------------------|-----------------------------------------------------------------------------------------------|-------------------------------------------------------------------------------------------------|---------------------------------------------------------------------------------------------------|----------------|----------------|----------------|----------------|----------------|----------------|----------------|
| <b>DAILY EXERCISES</b>                     |                                                                                               |                                                                                                 |                                                                                                   |                |                |                |                |                |                |                |
| Doming + long toe push                     |                                                                                               |                |                                                                                                   | Reps:          | Reps:          | Reps:          | Reps:          | Reps:          | Reps:          | Reps:          |
| Toe spread                                 |                                                                                               |                |                                                                                                   | Reps:          | Reps:          | Reps:          | Reps:          | Reps:          | Reps:          | Reps:          |
| Great toe extension                        |                                                                                               |                |                                                                                                   | Reps:          | Reps:          | Reps:          | Reps:          | Reps:          | Reps:          | Reps:          |
| Less toe extension                         |                                                                                               |                |                                                                                                   | Reps:          | Reps:          | Reps:          | Reps:          | Reps:          | Reps:          | Reps:          |
| Sit to stand                               |                                                                                               |                |                                                                                                   | Reps:          | Reps:          | Reps:          | Reps:          | Reps:          | Reps:          | Reps:          |
| Single leg balance                         |                                                                                               |                |                                                                                                   | Reps:          | Reps:          | Reps:          | Reps:          | Reps:          | Reps:          | Reps:          |
| <b>EXERCISES TO PERFORM 3 TIMES A WEEK</b> |                                                                                               |                                                                                                 |                                                                                                   |                |                |                |                |                |                |                |
| Doming                                     |  2 leg squat |  1 leg squat   |  Jump or hop     | Reps:<br>Sets: | Reps:<br>Sets: | Reps:<br>Sets: | Reps:<br>Sets: | Reps:<br>Sets: | Reps:<br>Sets: | Reps:<br>Sets: |
| Long toe push                              |  Sit         |  Stand         |  Squat           | Reps:<br>Sets: | Reps:<br>Sets: | Reps:<br>Sets: | Reps:<br>Sets: | Reps:<br>Sets: | Reps:<br>Sets: | Reps:<br>Sets: |
| Seated heel raise                          |  Sit         |  Band max reps |  Band max reps   | Reps:<br>Sets: | Reps:<br>Sets: | Reps:<br>Sets: | Reps:<br>Sets: | Reps:<br>Sets: | Reps:<br>Sets: | Reps:<br>Sets: |
| Standing heel raise                        |  2 leg      |  1 leg        |  1 leg max reps | Reps:<br>Sets: | Reps:<br>Sets: | Reps:<br>Sets: | Reps:<br>Sets: | Reps:<br>Sets: | Reps:<br>Sets: | Reps:<br>Sets: |
| <b>Other relevant information</b>          |                                                                                               |                                                                                                 |                                                                                                   |                |                |                |                |                |                |                |
| Details of other activities performed      |                                                                                               |                                                                                                 |                                                                                                   |                |                |                |                |                |                |                |
| Details of any adverse events              |                                                                                               |                                                                                                 |                                                                                                   |                |                |                |                |                |                |                |
| Details of treatment outside of study      |                                                                                               |                                                                                                 |                                                                                                   |                |                |                |                |                |                |                |

For this past week, indicate (circle) the *intensity* of your **first step pain** (first steps out of bed in the morning):

0 1 2 3 4 5 6 7 8 9  
No pain

(Date completed: \_\_\_\_\_)

10  
Worst pain imaginable

**Week 8**

Date of Week Beginning: \_\_\_\_\_

Participant ID: \_\_\_\_\_

| Exercise                                   |             |               |                | Monday         | Tuesday        | Wednesday      | Thursday       | Friday         | Saturday       | Sunday         |
|--------------------------------------------|-------------|---------------|----------------|----------------|----------------|----------------|----------------|----------------|----------------|----------------|
| <b>DAILY EXERCISES</b>                     |             |               |                |                |                |                |                |                |                |                |
| Doming + long toe push                     |             |               |                | Reps:          | Reps:          | Reps:          | Reps:          | Reps:          | Reps:          | Reps:          |
| Toe spread                                 |             |               |                | Reps:          | Reps:          | Reps:          | Reps:          | Reps:          | Reps:          | Reps:          |
| Great toe extension                        |             |               |                | Reps:          | Reps:          | Reps:          | Reps:          | Reps:          | Reps:          | Reps:          |
| Less toe extension                         |             |               |                | Reps:          | Reps:          | Reps:          | Reps:          | Reps:          | Reps:          | Reps:          |
| Sit to stand                               |             |               |                | Reps:          | Reps:          | Reps:          | Reps:          | Reps:          | Reps:          | Reps:          |
| Single leg balance                         |             |               |                | Reps:          | Reps:          | Reps:          | Reps:          | Reps:          | Reps:          | Reps:          |
| <b>EXERCISES TO PERFORM 3 TIMES A WEEK</b> |             |               |                |                |                |                |                |                |                |                |
| Doming                                     | 2 leg squat | 1 leg squat   | Jump or hop    | Reps:<br>Sets: | Reps:<br>Sets: | Reps:<br>Sets: | Reps:<br>Sets: | Reps:<br>Sets: | Reps:<br>Sets: | Reps:<br>Sets: |
| Long toe push                              | Sit         | Stand         | Squat          | Reps:<br>Sets: | Reps:<br>Sets: | Reps:<br>Sets: | Reps:<br>Sets: | Reps:<br>Sets: | Reps:<br>Sets: | Reps:<br>Sets: |
| Seated heel raise                          | Sit         | Band max reps | Band max reps  | Reps:<br>Sets: | Reps:<br>Sets: | Reps:<br>Sets: | Reps:<br>Sets: | Reps:<br>Sets: | Reps:<br>Sets: | Reps:<br>Sets: |
| Standing heel raise                        | 2 leg       | 1 leg         | 1 leg max reps | Reps:<br>Sets: | Reps:<br>Sets: | Reps:<br>Sets: | Reps:<br>Sets: | Reps:<br>Sets: | Reps:<br>Sets: | Reps:<br>Sets: |
| <b>Other relevant information</b>          |             |               |                |                |                |                |                |                |                |                |
| Details of other activities performed      |             |               |                |                |                |                |                |                |                |                |
| Details of any adverse events              |             |               |                |                |                |                |                |                |                |                |
| Details of treatment outside of study      |             |               |                |                |                |                |                |                |                |                |

For this past week, indicate (circle) the *intensity* of your **first step pain** (first steps out of bed in the morning):

0 1 2 3 4 5 6 7 8 9  
No pain

(Date completed: \_\_\_\_\_)

10  
Worst pain imaginable



**Week 9**

Date of Week Beginning: \_\_\_\_\_

Participant ID: \_\_\_\_\_

| Exercise                                   |                                                                                               |                                                                                                 |                                                                                                   | Monday         | Tuesday        | Wednesday      | Thursday       | Friday         | Saturday       | Sunday         |
|--------------------------------------------|-----------------------------------------------------------------------------------------------|-------------------------------------------------------------------------------------------------|---------------------------------------------------------------------------------------------------|----------------|----------------|----------------|----------------|----------------|----------------|----------------|
| <b>DAILY EXERCISES</b>                     |                                                                                               |                                                                                                 |                                                                                                   |                |                |                |                |                |                |                |
| Doming + long toe push                     |                                                                                               |                |                                                                                                   | Reps:          | Reps:          | Reps:          | Reps:          | Reps:          | Reps:          | Reps:          |
| Toe spread                                 |                                                                                               |                |                                                                                                   | Reps:          | Reps:          | Reps:          | Reps:          | Reps:          | Reps:          | Reps:          |
| Great toe extension                        |                                                                                               |                |                                                                                                   | Reps:          | Reps:          | Reps:          | Reps:          | Reps:          | Reps:          | Reps:          |
| Less toe extension                         |                                                                                               |                |                                                                                                   | Reps:          | Reps:          | Reps:          | Reps:          | Reps:          | Reps:          | Reps:          |
| Sit to stand                               |                                                                                               |                |                                                                                                   | Reps:          | Reps:          | Reps:          | Reps:          | Reps:          | Reps:          | Reps:          |
| Single leg balance                         |                                                                                               |                |                                                                                                   | Reps:          | Reps:          | Reps:          | Reps:          | Reps:          | Reps:          | Reps:          |
| <b>EXERCISES TO PERFORM 3 TIMES A WEEK</b> |                                                                                               |                                                                                                 |                                                                                                   |                |                |                |                |                |                |                |
| Doming                                     |  2 leg squat |  1 leg squat   |  Jump or hop     | Reps:<br>Sets: | Reps:<br>Sets: | Reps:<br>Sets: | Reps:<br>Sets: | Reps:<br>Sets: | Reps:<br>Sets: | Reps:<br>Sets: |
| Long toe push                              |  Sit         |  Stand         |  Squat           | Reps:<br>Sets: | Reps:<br>Sets: | Reps:<br>Sets: | Reps:<br>Sets: | Reps:<br>Sets: | Reps:<br>Sets: | Reps:<br>Sets: |
| Seated heel raise                          |  Sit         |  Band max reps |  Band max reps   | Reps:<br>Sets: | Reps:<br>Sets: | Reps:<br>Sets: | Reps:<br>Sets: | Reps:<br>Sets: | Reps:<br>Sets: | Reps:<br>Sets: |
| Standing heel raise                        |  2 leg      |  1 leg        |  1 leg max reps | Reps:<br>Sets: | Reps:<br>Sets: | Reps:<br>Sets: | Reps:<br>Sets: | Reps:<br>Sets: | Reps:<br>Sets: | Reps:<br>Sets: |
| <b>Other relevant information</b>          |                                                                                               |                                                                                                 |                                                                                                   |                |                |                |                |                |                |                |
| Details of other activities performed      |                                                                                               |                                                                                                 |                                                                                                   |                |                |                |                |                |                |                |
| Details of any adverse events              |                                                                                               |                                                                                                 |                                                                                                   |                |                |                |                |                |                |                |
| Details of treatment outside of study      |                                                                                               |                                                                                                 |                                                                                                   |                |                |                |                |                |                |                |

For this past week, indicate (circle) the *intensity* of your **first step pain** (first steps out of bed in the morning):

0 1 2 3 4 5 6 7 8 9  
No pain

(Date completed: \_\_\_\_\_)

10  
Worst pain imaginable

**Week 10**

Date of Week Beginning: \_\_\_\_\_

Participant ID: \_\_\_\_\_

| Exercise                                   |             |               |                | Monday         | Tuesday        | Wednesday      | Thursday       | Friday         | Saturday       | Sunday         |
|--------------------------------------------|-------------|---------------|----------------|----------------|----------------|----------------|----------------|----------------|----------------|----------------|
| <b>DAILY EXERCISES</b>                     |             |               |                |                |                |                |                |                |                |                |
| Doming + long toe push                     |             |               |                | Reps:          | Reps:          | Reps:          | Reps:          | Reps:          | Reps:          | Reps:          |
| Toe spread                                 |             |               |                | Reps:          | Reps:          | Reps:          | Reps:          | Reps:          | Reps:          | Reps:          |
| Great toe extension                        |             |               |                | Reps:          | Reps:          | Reps:          | Reps:          | Reps:          | Reps:          | Reps:          |
| Less toe extension                         |             |               |                | Reps:          | Reps:          | Reps:          | Reps:          | Reps:          | Reps:          | Reps:          |
| Sit to stand                               |             |               |                | Reps:          | Reps:          | Reps:          | Reps:          | Reps:          | Reps:          | Reps:          |
| Single leg balance                         |             |               |                | Reps:          | Reps:          | Reps:          | Reps:          | Reps:          | Reps:          | Reps:          |
| <b>EXERCISES TO PERFORM 3 TIMES A WEEK</b> |             |               |                |                |                |                |                |                |                |                |
| Doming                                     | 2 leg squat | 1 leg squat   | Jump or hop    | Reps:<br>Sets: | Reps:<br>Sets: | Reps:<br>Sets: | Reps:<br>Sets: | Reps:<br>Sets: | Reps:<br>Sets: | Reps:<br>Sets: |
| Long toe push                              | Sit         | Stand         | Squat          | Reps:<br>Sets: | Reps:<br>Sets: | Reps:<br>Sets: | Reps:<br>Sets: | Reps:<br>Sets: | Reps:<br>Sets: | Reps:<br>Sets: |
| Seated heel raise                          | Sit         | Band max reps | Band max reps  | Reps:<br>Sets: | Reps:<br>Sets: | Reps:<br>Sets: | Reps:<br>Sets: | Reps:<br>Sets: | Reps:<br>Sets: | Reps:<br>Sets: |
| Standing heel raise                        | 2 leg       | 1 leg         | 1 leg max reps | Reps:<br>Sets: | Reps:<br>Sets: | Reps:<br>Sets: | Reps:<br>Sets: | Reps:<br>Sets: | Reps:<br>Sets: | Reps:<br>Sets: |
| <b>Other relevant information</b>          |             |               |                |                |                |                |                |                |                |                |
| Details of other activities performed      |             |               |                |                |                |                |                |                |                |                |
| Details of any adverse events              |             |               |                |                |                |                |                |                |                |                |
| Details of treatment outside of study      |             |               |                |                |                |                |                |                |                |                |

For this past week, indicate (circle) the *intensity* of your **first step pain** (first steps out of bed in the morning):

0 1 2 3 4 5 6 7 8 9  
No pain

(Date completed: \_\_\_\_\_)

10  
Worst pain imaginable

**Week 11**

Date of Week Beginning: \_\_\_\_\_

Participant ID: \_\_\_\_\_

| Exercise                                   |             |               |                | Monday         | Tuesday        | Wednesday      | Thursday       | Friday         | Saturday       | Sunday         |
|--------------------------------------------|-------------|---------------|----------------|----------------|----------------|----------------|----------------|----------------|----------------|----------------|
| <b>DAILY EXERCISES</b>                     |             |               |                |                |                |                |                |                |                |                |
| Doming + long toe push                     |             |               |                | Reps:          | Reps:          | Reps:          | Reps:          | Reps:          | Reps:          | Reps:          |
| Toe spread                                 |             |               |                | Reps:          | Reps:          | Reps:          | Reps:          | Reps:          | Reps:          | Reps:          |
| Great toe extension                        |             |               |                | Reps:          | Reps:          | Reps:          | Reps:          | Reps:          | Reps:          | Reps:          |
| Less toe extension                         |             |               |                | Reps:          | Reps:          | Reps:          | Reps:          | Reps:          | Reps:          | Reps:          |
| Sit to stand                               |             |               |                | Reps:          | Reps:          | Reps:          | Reps:          | Reps:          | Reps:          | Reps:          |
| Single leg balance                         |             |               |                | Reps:          | Reps:          | Reps:          | Reps:          | Reps:          | Reps:          | Reps:          |
| <b>EXERCISES TO PERFORM 3 TIMES A WEEK</b> |             |               |                |                |                |                |                |                |                |                |
| Doming                                     | 2 leg squat | 1 leg squat   | Jump or hop    | Reps:<br>Sets: | Reps:<br>Sets: | Reps:<br>Sets: | Reps:<br>Sets: | Reps:<br>Sets: | Reps:<br>Sets: | Reps:<br>Sets: |
| Long toe push                              | Sit         | Stand         | Squat          | Reps:<br>Sets: | Reps:<br>Sets: | Reps:<br>Sets: | Reps:<br>Sets: | Reps:<br>Sets: | Reps:<br>Sets: | Reps:<br>Sets: |
| Seated heel raise                          | Sit         | Band max reps | Band max reps  | Reps:<br>Sets: | Reps:<br>Sets: | Reps:<br>Sets: | Reps:<br>Sets: | Reps:<br>Sets: | Reps:<br>Sets: | Reps:<br>Sets: |
| Standing heel raise                        | 2 leg       | 1 leg         | 1 leg max reps | Reps:<br>Sets: | Reps:<br>Sets: | Reps:<br>Sets: | Reps:<br>Sets: | Reps:<br>Sets: | Reps:<br>Sets: | Reps:<br>Sets: |
| <b>Other relevant information</b>          |             |               |                |                |                |                |                |                |                |                |
| Details of other activities performed      |             |               |                |                |                |                |                |                |                |                |
| Details of any adverse events              |             |               |                |                |                |                |                |                |                |                |
| Details of treatment outside of study      |             |               |                |                |                |                |                |                |                |                |

For this past week, indicate (circle) the *intensity* of your **first step pain** (first steps out of bed in the morning):

0 1 2 3 4 5 6 7 8 9  
No pain

(Date completed: \_\_\_\_\_)

10  
Worst pain imaginable

**Week 12**

Date of Week Beginning: \_\_\_\_\_

Participant ID: \_\_\_\_\_

| Exercise                                   |             |               |                | Monday         | Tuesday        | Wednesday      | Thursday       | Friday         | Saturday       | Sunday         |
|--------------------------------------------|-------------|---------------|----------------|----------------|----------------|----------------|----------------|----------------|----------------|----------------|
| <b>DAILY EXERCISES</b>                     |             |               |                |                |                |                |                |                |                |                |
| Doming + long toe push                     |             |               |                | Reps:          | Reps:          | Reps:          | Reps:          | Reps:          | Reps:          | Reps:          |
| Toe spread                                 |             |               |                | Reps:          | Reps:          | Reps:          | Reps:          | Reps:          | Reps:          | Reps:          |
| Great toe extension                        |             |               |                | Reps:          | Reps:          | Reps:          | Reps:          | Reps:          | Reps:          | Reps:          |
| Less toe extension                         |             |               |                | Reps:          | Reps:          | Reps:          | Reps:          | Reps:          | Reps:          | Reps:          |
| Sit to stand                               |             |               |                | Reps:          | Reps:          | Reps:          | Reps:          | Reps:          | Reps:          | Reps:          |
| Single leg balance                         |             |               |                | Reps:          | Reps:          | Reps:          | Reps:          | Reps:          | Reps:          | Reps:          |
| <b>EXERCISES TO PERFORM 3 TIMES A WEEK</b> |             |               |                |                |                |                |                |                |                |                |
| Doming                                     | 2 leg squat | 1 leg squat   | Jump or hop    | Reps:<br>Sets: | Reps:<br>Sets: | Reps:<br>Sets: | Reps:<br>Sets: | Reps:<br>Sets: | Reps:<br>Sets: | Reps:<br>Sets: |
| Long toe push                              | Sit         | Stand         | Squat          | Reps:<br>Sets: | Reps:<br>Sets: | Reps:<br>Sets: | Reps:<br>Sets: | Reps:<br>Sets: | Reps:<br>Sets: | Reps:<br>Sets: |
| Seated heel raise                          | Sit         | Band max reps | Band max reps  | Reps:<br>Sets: | Reps:<br>Sets: | Reps:<br>Sets: | Reps:<br>Sets: | Reps:<br>Sets: | Reps:<br>Sets: | Reps:<br>Sets: |
| Standing heel raise                        | 2 leg       | 1 leg         | 1 leg max reps | Reps:<br>Sets: | Reps:<br>Sets: | Reps:<br>Sets: | Reps:<br>Sets: | Reps:<br>Sets: | Reps:<br>Sets: | Reps:<br>Sets: |
| <b>Other relevant information</b>          |             |               |                |                |                |                |                |                |                |                |
| Details of other activities performed      |             |               |                |                |                |                |                |                |                |                |
| Details of any adverse events              |             |               |                |                |                |                |                |                |                |                |
| Details of treatment outside of study      |             |               |                |                |                |                |                |                |                |                |

For this past week, indicate (circle) the *intensity* of your **first step pain** (first steps out of bed in the morning):

0 1 2 3 4 5 6 7 8 9  
No pain

(Date completed: \_\_\_\_\_)

10  
Worst pain imaginable
