# Supplementary material for: Foot exercise plus education versus wait and see for the treatment of plantar heel pain (FEET trial): a protocol for a feasibility study
Source: Springer Nature journal article supplement (doi:10.1186/s13047-020-00384-1), 2020-01-01
Supplement: MOESM7 [file 17966790]

| <b>WEEK</b> | <b>PROBLEMS ENCOUNTERED</b> | <b>ACTION TAKEN</b> | <b>RESPONSE</b> | <b>*FIRST STEP PAIN --/10</b> |
|-------------|-----------------------------|---------------------|-----------------|-------------------------------|
| 6 Date:     |                             |                     |                 |                               |
| 7 Date:     |                             |                     |                 |                               |
| 8 Date:     |                             |                     |                 |                               |
| 9 Date:     |                             |                     |                 |                               |
| 10 Date:    |                             |                     |                 |                               |
| 11 Date:    |                             |                     |                 |                               |
| 12 Date:    |                             |                     |                 |                               |
